# Supplementary material
Source: PubMed Central journal article supplement (PMC2939169)
Supplement: NIHMS227562-supplement-1_si_001.pdf [file NIHMS227562-supplement-1_si_001.pdf]

## Supporting Materials

# Conductive cable fibers with insulating surface prepared by co-axial electrospinning of multi-walled nanotubes and cellulose

Minoru Miyauchi,<sup>1,2</sup> Jianjun Miao,<sup>2,3</sup> Trevor J. Simmons,<sup>1,4</sup> Jong-Won Lee,<sup>1</sup> Thomas V. Doherty,<sup>1,2,7</sup> Jonathan S. Dordick,<sup>1,2,3,5,6</sup> Robert J. Linhardt<sup>1,2,3,4,5,6</sup>

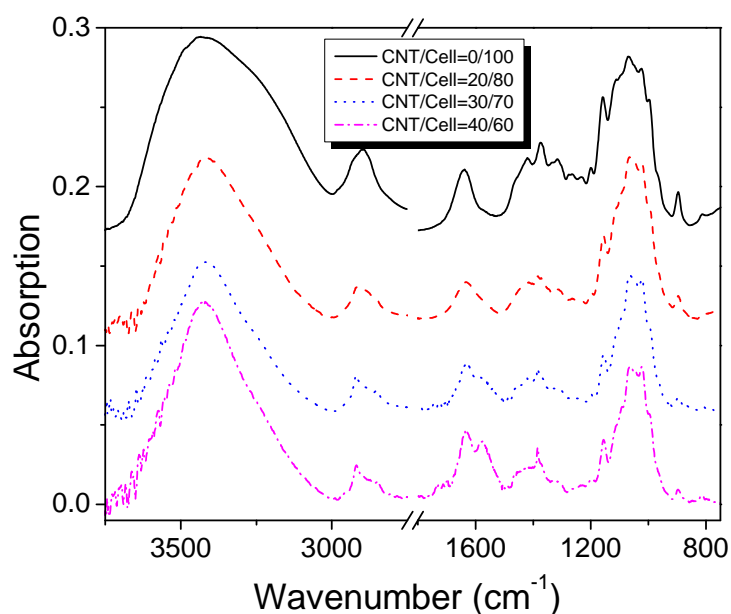

**Figure S1** FT-IR spectra of MWNT-cellulose fibers with different loading of MWNT.

**Table S1** Crystallinity Index calculated from FT-IR spectra, the ratio in the first row is MWNT/Cellulose.

|                     | 0/100 | 20/80 | 30/70 | 40/60 |
|---------------------|-------|-------|-------|-------|
| $A_{1372}/A_{2900}$ | 1.08  | 1.35  | 1.40  | 1.44  |
